# Supplementary material for: Process optimization using machine learning enhanced design of experiments (DOE): ranibizumab refolding as a case study
Source: Royal Society of Chemistry journal article supplement (doi:10.1039/d2re00440b), 2022-11-23
Supplement: d2re00440b1.pdf [file d2re00440b1.pdf]

## **SUPPLEMENTARY INFORMATION**

### **S1: Methodology for refolding experimentation**

Chemicals including urea, D-sorbitol, L-glutathione oxidized (GSSG), glacial acetic acid, dithiothreitol (DTT), hydrochloric acid (HCL), trifluoroacetic acid (TFA) and acetonitrile (ACN) were purchased from Sisco Research Laboratories Pvt. Ltd. (SRL) and used in buffer preparations along with L-Arginine (Molychem) and Tri-base from Merck Life Science Pvt. Ltd, India. Reduction was performed using 4 mM DTT for 30 minutes under stirring. SIB samples were generated after centrifugation at 12,000 rpm for 20 minutes. 5 mM GSSG (oxidized) was added 5-15 minutes prior to SIB addition to the refolding buffer (50 mM Tris, 5 % Sorbitol, 0.7 M Arginine, pH 9.0-11.0). Drip dilution was utilized for SIB dissolution, diluting them 30 times. Refolding was conducted in a beaker (500ml) equipped with a magnetic stirrer having fixed frequency (250 rpm) and different probes were inserted directly into the beakers for data acquisition during the process as shown in Figure 3a. Eutech pH 510 probe spanned from 0 to 14 and the temperature probe from 0 to 100°C. Each probe was standardized, calibrated, and tested against a standard solution. For all the recorded data, the corresponding value of yield and product concentration was calculated using Reversed Phase HPLC. Here, C-8 RP-HPLC column (Zorbax 300SB, 4.6 X 150 mm) (Agilent Technologies) was used on an Agilent 1260 HPLC system. Mobile phases A and B consisted of deionized water with 0.1 % (v/v) TFA and ACN with 0.1 % TFA (v/v), respectively. 30 % mobile phase B was utilized for column equilibration and a linear gradient of 30 to 38 % B carried out for elution. Method was observed at a flow rate of 1.2 mL/min and 80 °C oven temperature. The detection was performed at 215 nm wavelength to achieve the chromatogram.

### **Screening of process parameters**

Foremost, the importance of refolding time was analyzed. It was seen through RP-HPLC analysis, that from the 8<sup>th</sup> hour of refolding, the reaction exhibited formation of the native Ranibizumab molecule. Samples at various time points were analyzed using process analytical tools to validate the observation and the time points were confirmed. Based on this, the refolding time was divided in 2 segments i.e., 0 to 8hr and 8hr to total refolding time (24 hrs in the present case). In this study, segment based experimental technique is adopted for acquiring data for characterization space over conventional refolding technique as it results in higher yield [Figure S1]. For the first segment, it was seen that temperature, concentration, and pH play a critical role whereas in second segment, temperature and pH were deemed important.

Once all the relevant parameters were established after FMEA analysis, the next step was to establish the parameters relevant for each section and determine the permissible range. Two approaches were used to shortlist parameters step by step as shown in Table (S1). JMP® statistical software (SAS Institute, Cary, NC) was used for the analysis.

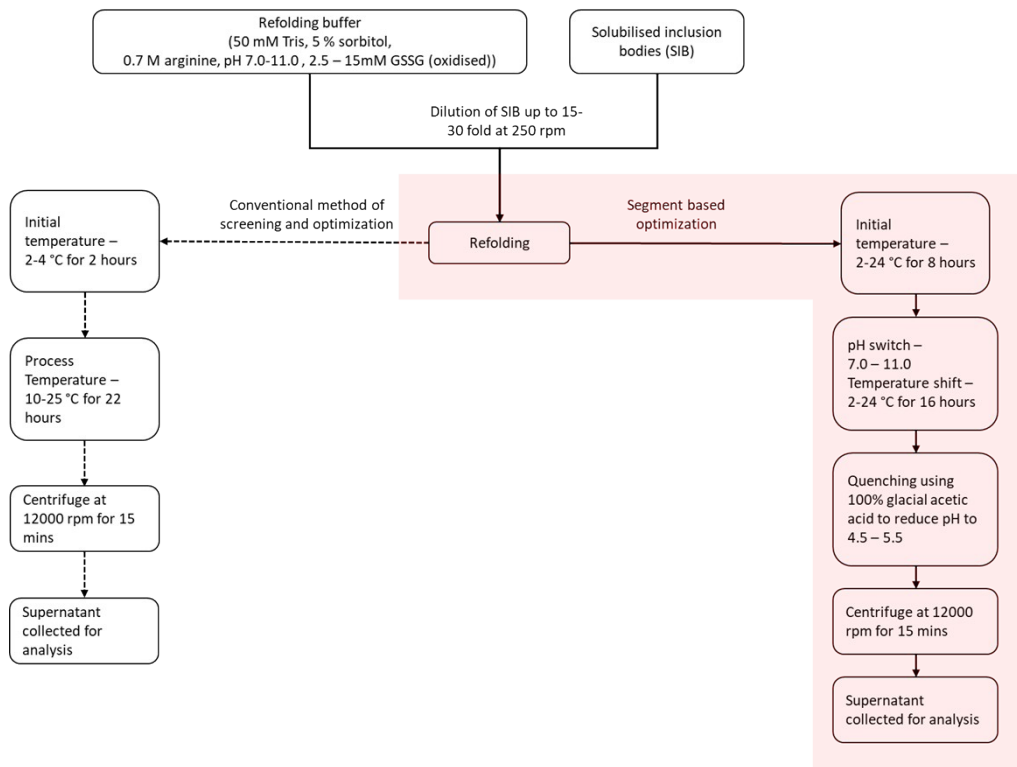

Figure S1: Segment based methodology adopted for refolding of protein in the present study for data acquisition

**Table S1: Summary of the parameters shortlisted based on fractional factorial screening and OFAT approaches; X indicate the rejected parameters and  $\mathcal{R}$  indicate the parameters considered for next step**

| S. No. | Parameters                     | Segment 1                      |                | Segment 2                |                |
|--------|--------------------------------|--------------------------------|----------------|--------------------------|----------------|
|        |                                | Fractional Factorial screening | OFAT screening | Full factorial screening | OFAT screening |
| 1      | Concentration IB               | $\mathcal{R}$                  | $\mathcal{R}$  | s                        | X              |
| 2      | Concentration of urea          | X                              | X              | X                        | X              |
| 3      | Concentration of DTT           | X                              | X              | X                        | X              |
| 4      | Concentration of GSSG          | X                              | X              | X                        | X              |
| 5      | pH of solubilization buffer    | X                              | X              | X                        | X              |
| 6      | pH of refolding buffer         | $\mathcal{R}$                  | $\mathcal{R}$  | $\mathcal{R}$            | $\mathcal{R}$  |
| 7      | Refolding time                 | $\mathcal{R}$                  | $\mathcal{R}$  | $\mathcal{R}$            | $\mathcal{R}$  |
| 8      | Refolding temperature;         | $\mathcal{R}$                  | $\mathcal{R}$  | $\mathcal{R}$            | $\mathcal{R}$  |
| 9      | Sequence of additives addition | X                              | X              | X                        | X              |

**S2: Mathematical formulation of linear regression technique**

In linear regression, the model assumes linear relationship between the dependent and regressor variables and can be written as

$$y_i = b_0 + b_1x_{i1} + \dots + b_px_{ip} + \varepsilon_i = x_i^T b + \varepsilon_i \quad \dots\dots\dots(s1)$$

Where, i varies from 1 to n and <sup>T</sup> denotes the transpose. In matrix form, equation 2 can be expressed as

$$Y = Xb + \varepsilon \quad \dots\dots\dots(s2)$$

Where, Y is [y<sub>1</sub>, y<sub>2</sub>,..... y<sub>n</sub>]<sup>T</sup>, X is [x<sub>1</sub><sup>T</sup>, x<sub>2</sub><sup>T</sup>,....., x<sub>n</sub><sup>T</sup>]<sup>T</sup>, b is [b<sub>0</sub>, b<sub>1</sub>,.....,b<sub>n</sub>]<sup>T</sup>, and ε is [ε<sub>1</sub>, ε<sub>2</sub>,....., ε<sub>n</sub>]<sup>T</sup>. Numerous techniques, differing in terms of computation simplicity, have been developed for parameter estimation. One of the most common techniques is error minimization wherein square of error, ε, is minimized to estimate the regression coefficient b. The technique

assumes model prediction is  $Y_i \approx b_0 + \sum_{j=1}^m b_j x_j^i$  with x<sub>i</sub> being [x<sub>1</sub><sup>i</sup>, x<sub>2</sub><sup>i</sup>,....., x<sub>n</sub><sup>i</sup>] and b being [b<sub>0</sub>, b<sub>1</sub>,.....,b<sub>n</sub>]. The objective function is formulated to determine the value of b such that ε<sup>2</sup>

$$= \arg \left( \sum_{i=1}^n (b \cdot x_i - y_i)^2 \right) \text{ is minimum.}$$

**S3: Mathematical formulation of Support vector regression (SVR)**

For a finite dataset represented as  $F = (x_i, y_i)$  for  $i$  varying from 1 to  $n$ , obtained from an unknown relation  $y = g(x)$ , support vector regression technique aims to determine a function  $y = f(x)$  such that  $f$  is as close to  $g$  as possible. This function  $f$  is derived using data from the set  $F$ . For linear regression, linear relation between  $y$  and  $x$  is assumed to be linear with  $x$  as feature vector having 'm' dimensions. Mathematically, it can be written as

$$y = g(x, w, b) = w \cdot x + b = \sum w_j x_j + b \quad \dots\dots\dots(s3)$$

Where,  $j$  varies from 1 to  $m$ . Once the relationship is finalised, the next step is to determine the hyperplane equation. It is given as :

$$y = f(x, \alpha, b) = \sum \alpha_k y_k x_k \cdot x + b \quad \dots\dots\dots(s4)$$

Where,  $x_k$  are support vectors with corresponding labels as  $y_k$ .

Support vectors and the parameters ( $\alpha$ ,  $b$ ) can be determined to build a model. However, for nonlinear systems,  $x$  data points are mapped on to new feature space. In this new space, the relation between the new feature vectors and  $y$  data points is assumed to be linear. The hyperplane equation is modified as :

$$y = f(x, \alpha, b) = \sum \alpha_k y_k K(x_k, x) + b \quad \dots\dots\dots(s5)$$

Where,  $K$  is kernel function having inner product of feature vectors.

**S4: Model performance evaluation metrics**

Goodness of fit indices: Akaike Information Criterion (AIC) and Bayesian Information Criterion (BIC)

AIC and BIC indices enable model selection with highest explanatory power. These criteria are implemented for measurement of model fit trade off with model complexity and are calculated as

$$AIC = -2\log L + 2K \dots\dots\dots(s6)$$

$$BIC = -2 \log L + K \log N \dots\dots\dots(s7)$$

Wherein L represents likelihood, K represents the number of model parameters, and N is the number of data points used to train a model. Lowest values of AIC and BIC are preferred. Of the two, BIC is preferred over AIC, as it severely penalizes the model for having multiple parameters. AIC is suitable for determining the best model for prediction whereas BIC is more apt for selecting the correct model.

*Coefficient of determination (R<sup>2</sup>)*

R<sup>2</sup> is the most commonly used indicator for determining the accuracy of a regression algorithm with a range of [0, 1]. It is estimated by generating model predictions for the data not utilized in model training. The biggest advantage it offers is that it can be used to compare models generated using different datasets. It is given as:

$$R^2 = 1 - \frac{\sum_{i=1}^n (y_i - \hat{y}_i)^2}{\sum_{i=1}^n (y_i - \bar{y}_i)^2} \dots\dots\dots(s8)$$

Where,  $\bar{y}_i$  is the mean value of  $y_i$ . When the R<sup>2</sup> is equal to 1, it means that the regression model makes 100% accurate predictions. The greater the R<sup>2</sup> number, the better the fitting result is in general.

*p-value*

The p-value indicates the probability of finding a particular set of data under null hypothesis. It determines that whether the relationship that is observed in the dataset exists for larger population or not. The p value tests null hypothesis for each variable. The null hypothesis considers if there is no correlation between the independent and dependent variable. No correlation indicates no association between the changes in independent variable and shift in

dependent variable. If p value is less than threshold value then it is said that enough data is provided by the sample dataset to reject null hypothesis and there is a non-zero correlation between the variables whereas if the p value is more then it indicates that sufficient evidence is not there to conclude a non-zero correlation. So, the independent variables having p value less than threshold are statistically significant and are considered for the analysis. It is calculated by employing a statistical test on the data. Commonly,  $p < 0.05$  is considered as a threshold. This means that there is a chance of 5% that the null hypothesis holds true.

## S5: Statistical analysis

**Table S2: Statistical analysis of the linear regression model with different interaction terms for segment 1**

| Parameters                       | Standard error of the coefficients | t <sub>Stat</sub> | SumSq    | DF | MeanSq   | F        | p value  |
|----------------------------------|------------------------------------|-------------------|----------|----|----------|----------|----------|
| For model Eq. 4                  |                                    |                   |          |    |          |          |          |
| C <sub>1</sub>                   | 0.7456                             | 0.8005            | 6.466104 | 1  | 6.466104 | 0.475579 | 0.50355  |
| pH <sub>1</sub>                  | 17.9211                            | 1.1145            | 269.2814 | 1  | 269.2814 | 19.80552 | 0.000792 |
| T <sub>1</sub>                   | 3.1367                             | -                 |          |    |          |          |          |
|                                  |                                    | 0.4847            | 152.429  | 1  | 152.429  | 11.21108 | 0.005798 |
| C <sub>1</sub> * pH <sub>1</sub> | 0.0737                             | -                 |          |    |          |          |          |
|                                  |                                    | 0.5069            | 3.494656 | 1  | 3.494656 | 0.25703  | 0.621355 |
| C <sub>1</sub> *T <sub>1</sub>   | 0.0105                             | 0.8311            | 9.391397 | 1  | 9.391397 | 0.690733 | 0.422144 |
| pH <sub>1</sub> * T <sub>1</sub> | 0.3122                             | 1.0174            | 14.0743  | 1  | 14.0743  | 1.035158 | 0.329025 |
| C <sub>1</sub> <sup>2</sup>      | 0.0014                             | -                 |          |    |          |          |          |
|                                  |                                    | 2.4575            | 82.11668 | 1  | 82.11668 | 6.039643 | 0.030172 |
| pH <sub>1</sub> <sup>2</sup>     | 0.8443                             | -                 |          |    |          |          |          |
|                                  |                                    | 1.0879            | 16.0935  | 1  | 16.0935  | 1.18367  | 0.297979 |
| T <sub>1</sub> <sup>2</sup>      | 0.0379                             | -                 |          |    |          |          |          |
|                                  |                                    | 3.1914            | 138.4849 | 1  | 138.4849 | 10.1855  | 0.007754 |
| For model Eq. 5                  |                                    |                   |          |    |          |          |          |
| C <sub>1</sub>                   | 0.4134                             | 3.2005            | 6.157486 | 1  | 6.157486 | 0.503321 | 0.488255 |
| pH <sub>1</sub>                  | 0.8326                             | 4.2175            | 217.6091 | 1  | 217.6091 | 17.78764 | 0.000654 |
| C <sub>1</sub> <sup>2</sup>      | 0.0096                             | -                 |          |    |          |          |          |
|                                  |                                    | 3.1163            | 39.09562 | 1  | 39.09562 | 3.195725 | 0.092785 |
| T <sub>1</sub> <sup>2</sup>      | 0.0067                             | -                 |          |    |          |          |          |
|                                  |                                    | 4.3024            | 226.4565 | 1  | 226.4565 | 18.51084 | 0.000548 |
| C <sub>1</sub> <sup>3</sup>      | 6.0775e <sup>-5</sup>              | 2.9414            | 105.8504 | 1  | 105.8504 | 8.652343 | 0.009579 |



**Table S3: Statistical analysis of the linear regression model with different interaction terms for segment 2**

| Parameters             | Standard error of the coefficients | t <sub>Stat</sub> | SumSq    | DF | MeanSq   | F        | p value  |
|------------------------|------------------------------------|-------------------|----------|----|----------|----------|----------|
| <b>For model eq. 6</b> |                                    |                   |          |    |          |          |          |
| pH                     | 238.3222                           | 2.2687            | 83.68399 | 1  | 83.68399 | 5.781002 | 0.033252 |
| Temp                   | 0.5909                             | 3.9109            | 108.71   | 1  | 108.71   | 7.509835 | 0.017918 |
| pH <sup>2</sup>        | 25.8822                            | -2.1979           | 65.62344 | 1  | 65.62344 | 4.533355 | 0.054636 |
| Temp <sup>2</sup>      | 0.0193                             | -3.3861           | 165.9782 | 1  | 165.9782 | 11.466   | 0.005406 |
| pH <sup>3</sup>        | 0.9316                             | 2.1132            | 64.64578 | 1  | 64.64578 | 4.465817 | 0.056206 |

**Supplementary S6: Comparison performance of SVR and GPR algorithm**

|                                 | SEGMENT 1                                      |                                      | SEGMENT 2                                  |                                      |
|---------------------------------|------------------------------------------------|--------------------------------------|--------------------------------------------|--------------------------------------|
| Parameters                      | GPR                                            | SVR                                  | GPR                                        | SVR                                  |
|                                 | Ardexponential<br>kernel<br>(sigma = 0.011208) | RBFkernel<br>(kernel scale=<br>0.01) | Ardexponential<br>kernel<br>(Sigma = 1.67) | RBF kernel<br>(kernel scale=<br>0.1) |
| <b>R<sup>2</sup></b>            | 0.97                                           | 0.98                                 | 0.99                                       | 0.93                                 |
| <b>Adjusted R<sup>2</sup></b>   | 0.93                                           | 0.99                                 | 0.97                                       | 0.87                                 |
| <b>RMS training<br/>error</b>   | 0.95                                           | 1.15                                 | 0.53                                       | 0.87                                 |
| <b>RMS cross val.<br/>error</b> | 1.81                                           | 2.52                                 | 5.51                                       | 1.9                                  |
